# Supplementary material for: TRiC controls transcription resumption after UV damage by regulating Cockayne syndrome protein A
Source: PubMed Central journal article supplement (PMC5847541; doi:10.1038/s41467-018-03484-6), 2018-03-12
Supplement: 41467_2018_3484_MOESM3_ESM.pdf [file 41467_2018_3484_MOESM3_ESM.pdf]

**Descriptions of Additional Supplementary Files:**

File Name: Supplementary Dataset 1

Description: describing mass spectrometry-based analysis of CSA-interacting proteins

File Name: Supplementary Dataset 2

Description: describing cross-links identified by xIP-MS of CSA-GFP from CS3BE-SV40 cells
